# Supplementary material for: Fluorine-Containing, Self-Assembled Graft Copolymer for Tuning the Hydrophilicity and Antifouling Properties of PVDF Ultrafiltration Membranes
Source: MDPI journal article supplement (doi:10.3390/polym15173623), 2023-09-01
Supplement: s1 [file s1]

## Supporting Information

# Fluorine-Containing, Self-Assembled Graft Copolymer for Tuning the Hydrophilicity and Antifouling Properties of PVDF Ultrafiltration Membranes

Seung Jae Moon, Young Jun Kim, Du Ru Kang, So Youn Lee and Jong Hak Kim<sup>\*</sup>

*Department of Chemical and Biomolecular Engineering, Yonsei University,*

*50 Yonsei-ro, Seodaemun-gu, Seoul 03722, South Korea*

\*Correspondence should be addressed to:

E-mail: [jonghak@yonsei.ac.kr](mailto:jonghak@yonsei.ac.kr)

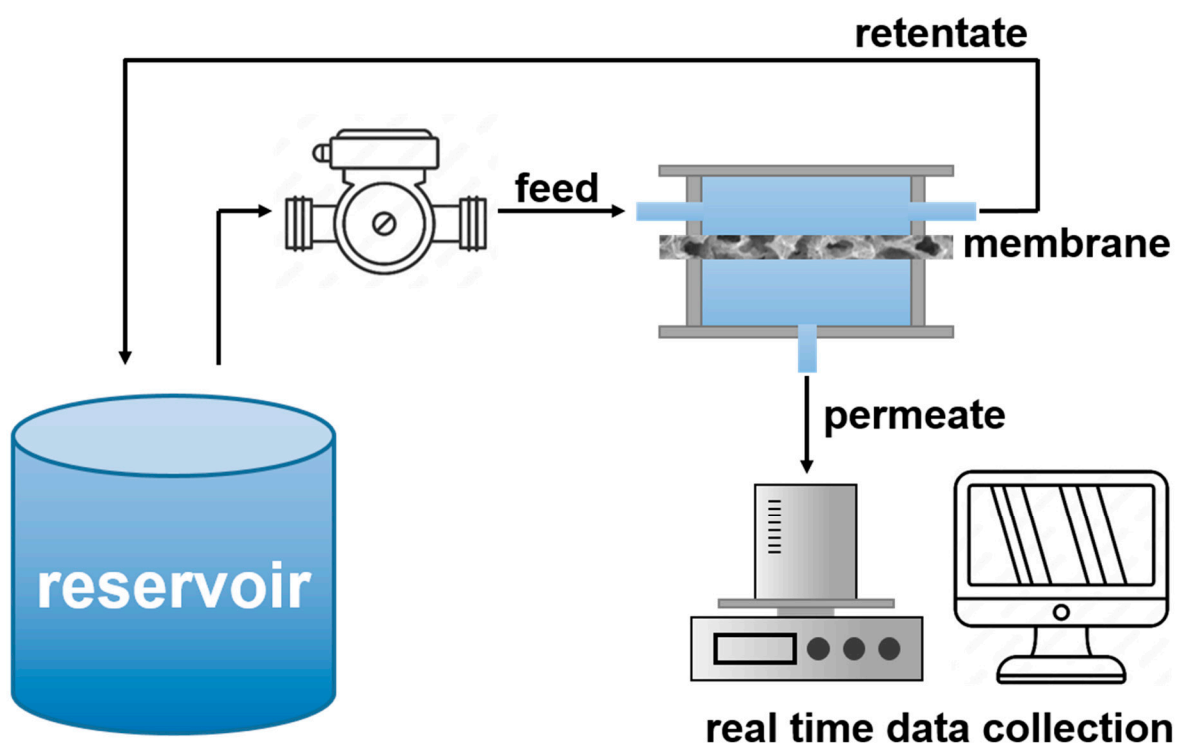

**Figure S1.** Schematic diagram of the setup for water permeation test.

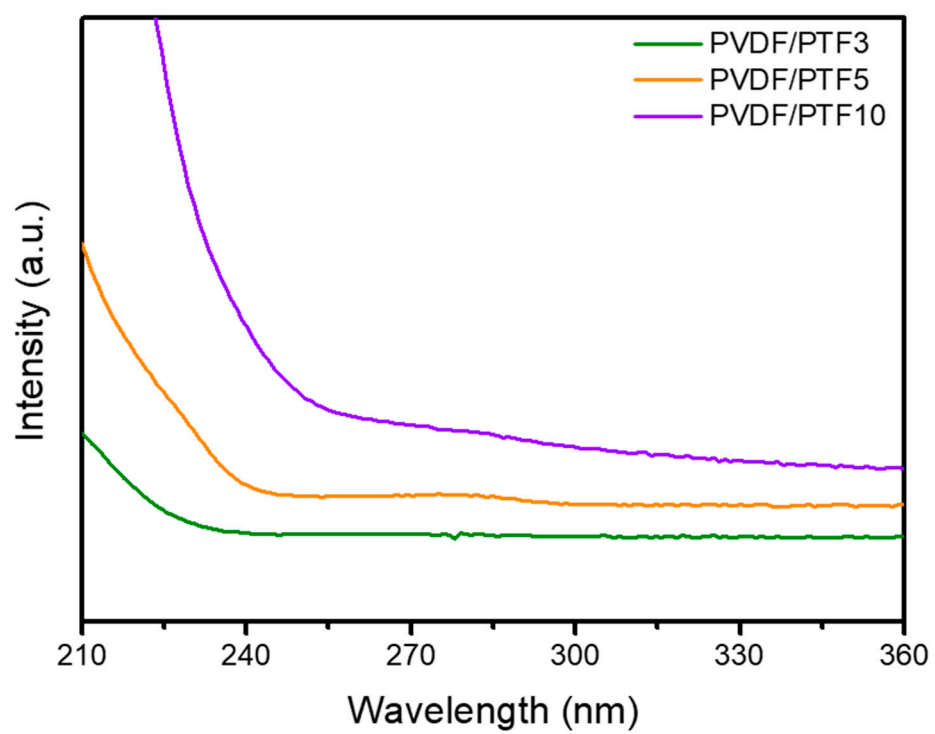

**Figure S2.** UV-vis spectra of BSA solutions obtained after filtration test through PVDF/PTF membranes.

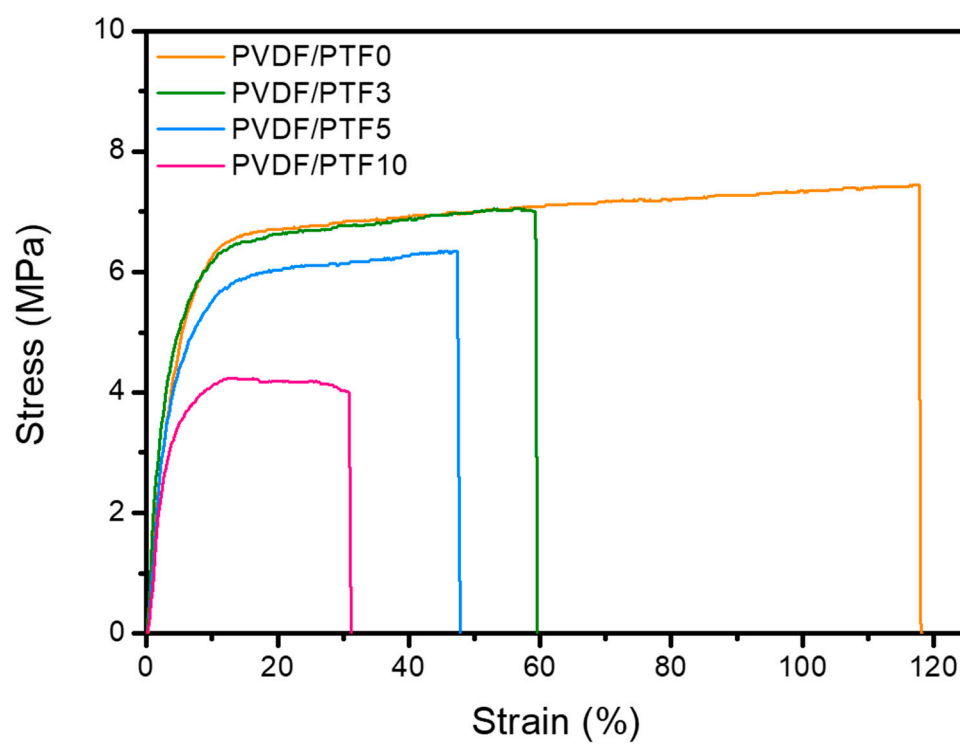

**Figure S3.** Stress–strain curves of PVDF/PTF membranes with various PTF loadings.

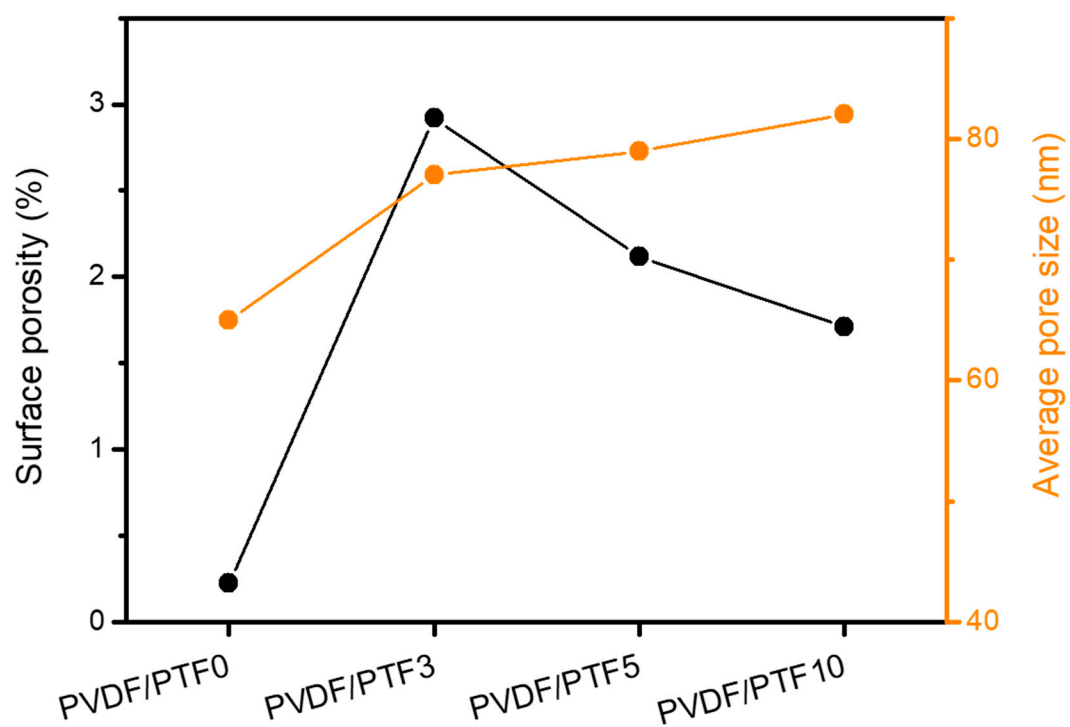

**Figure S4.** Surface porosity and average pore size of PVDF/PTF membranes with various PTF loadings.

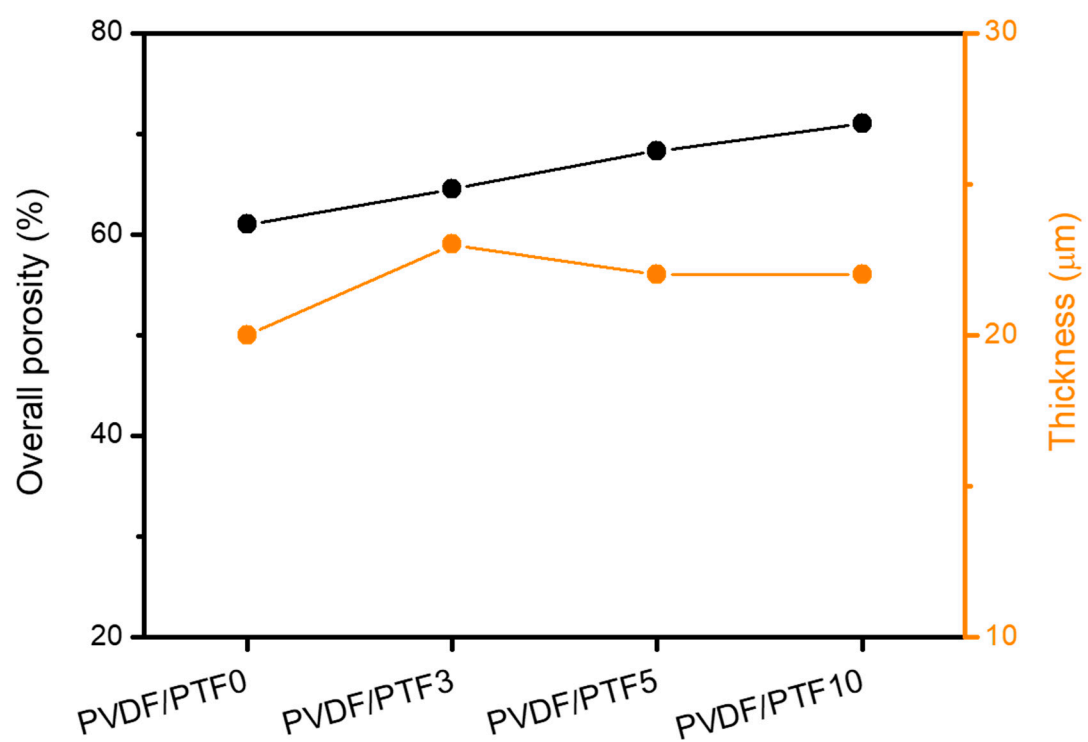

**Figure S5.** Overall porosity and thickness of PVDF/PTF membranes with various PTF loadings.
